# Supplementary material for: Vanadium based carbide–oxide heterogeneous V2O5@V2C nanotube arrays for high-rate and long-life lithium–sulfur batteries
Source: Royal Society of Chemistry journal article supplement (doi:10.1039/d0nr05199c), 2020-01-01
Supplement: d0nr05199c1.pdf [file d0nr05199c1.pdf]

## Supporting Information:

# Vanadium Based Carbide-Oxide Heterogeneous $V_2O_5@V_2C$ Nanotube Array for High-Rate and Long-Life Lithium- Sulfur Batteries

*Zhenguo Wang<sup>a</sup>, Ke Yu<sup>\*, a, b</sup>, Shijing Gong<sup>a</sup>, Erwei Du<sup>a</sup> and Ziqiang Zhu<sup>a</sup>*

<sup>a</sup> Key Laboratory of Polar Materials and Devices (MOE), Department of Electronics,  
East China Normal University, Shanghai 200241, China

<sup>b</sup> Collaborative Innovation Center of Extreme Optics, Shanxi University, Taiyuan,  
Shanxi 030006, China

## Corresponding Author

\* Tel.: +86 21 54345198; Fax: +86 21 54345119. E-mail address: yk5188@263.net

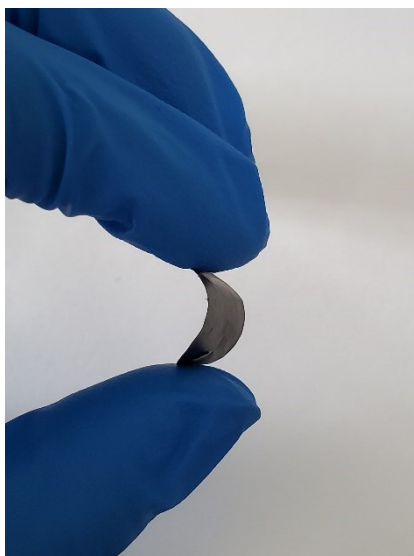

**Figure S1 The  $V_2O_5@V_2C/S$  cathode.**

The amount of pole piece prepared for  $8.4 \text{ mg}\cdot\text{cm}^{-2}$ : 1.68 g sublimed sulfur, 0.42 g  $V_2O_5@V_2C$ , and the coating thickness is about 70 microns; the amount of pole piece prepared for  $4.2 \text{ mg}\cdot\text{cm}^{-2}$ : 0.84 g sublimed sulfur, 0.21 g  $V_2O_5@V_2C$ , the coating thickness is about 45 microns; the amount of pole piece prepared for  $2.0 \text{ mg}\cdot\text{cm}^{-2}$ : 0.40g sulfur, 0.10 g  $V_2O_5@V_2C$ , the coating thickness is about 25 microns; during the battery preparation and assembly process, the size of the aluminum foil is  $200 \text{ mm}\times 100 \text{ mm}$ , use a microtome to cut the positive pole piece with a diameter of 15 mm, the electrolyte dosage is 80-120 microliters, the diameter of the cut diaphragm disc is 16 mm, the thickness of the metal lithium sheet used is 0.6 mm, and the diameter is also 15 mm.

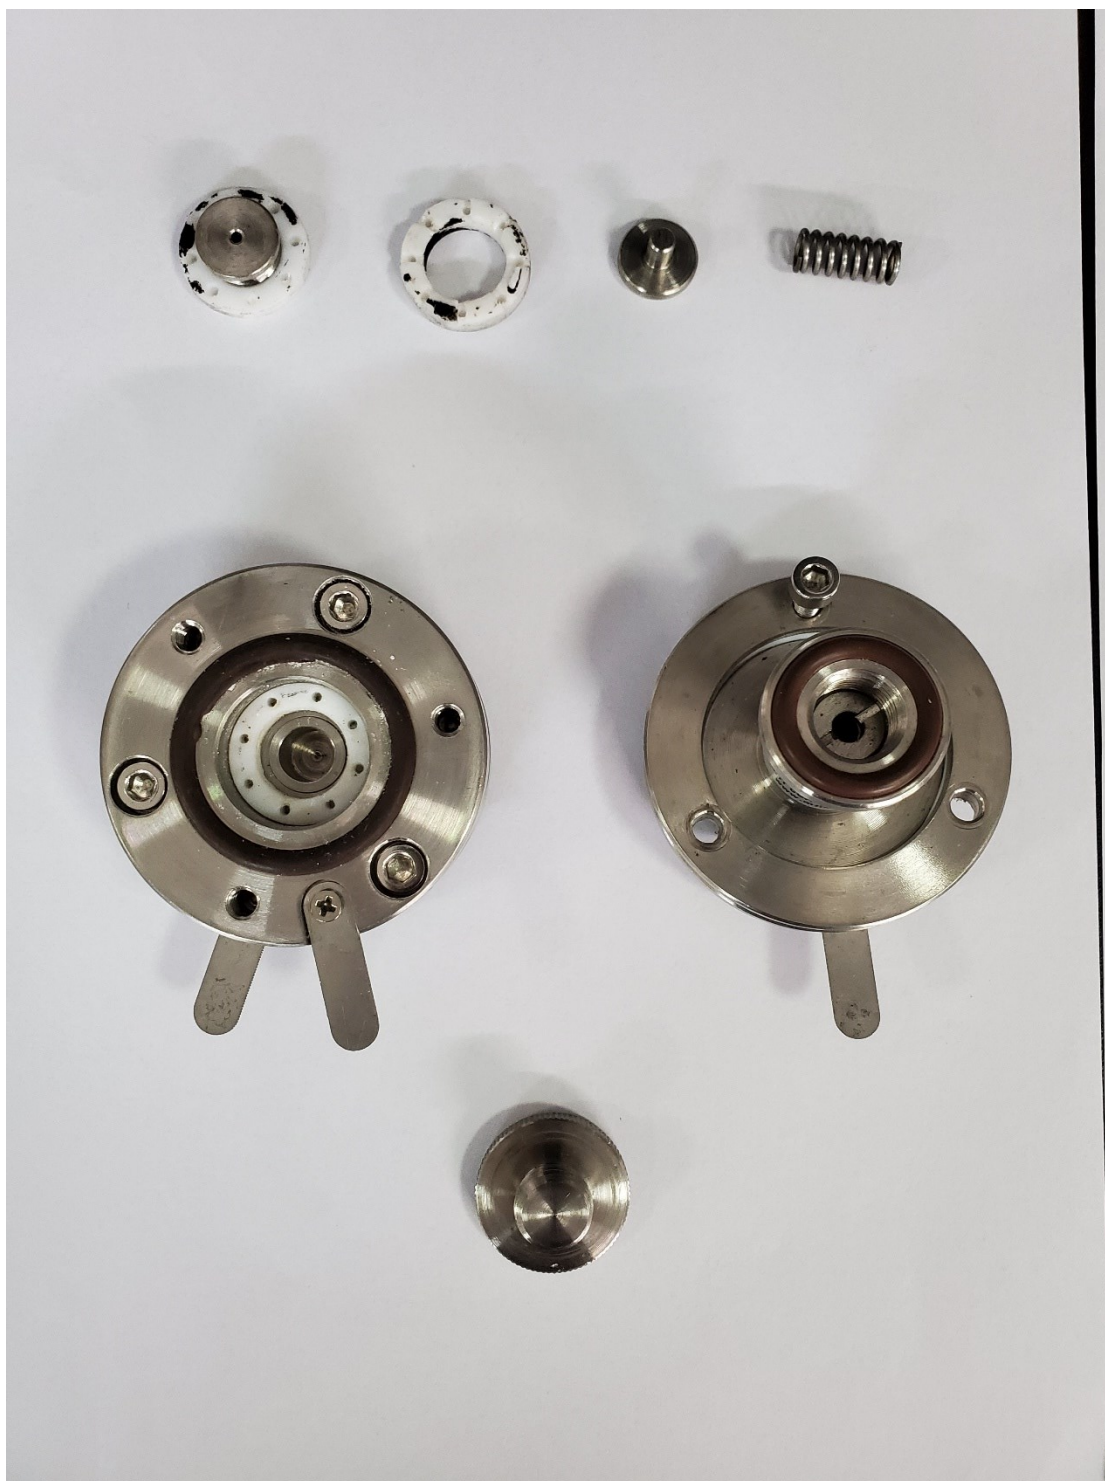

**Figure S2 Digital photo of removable three-electrode battery.**

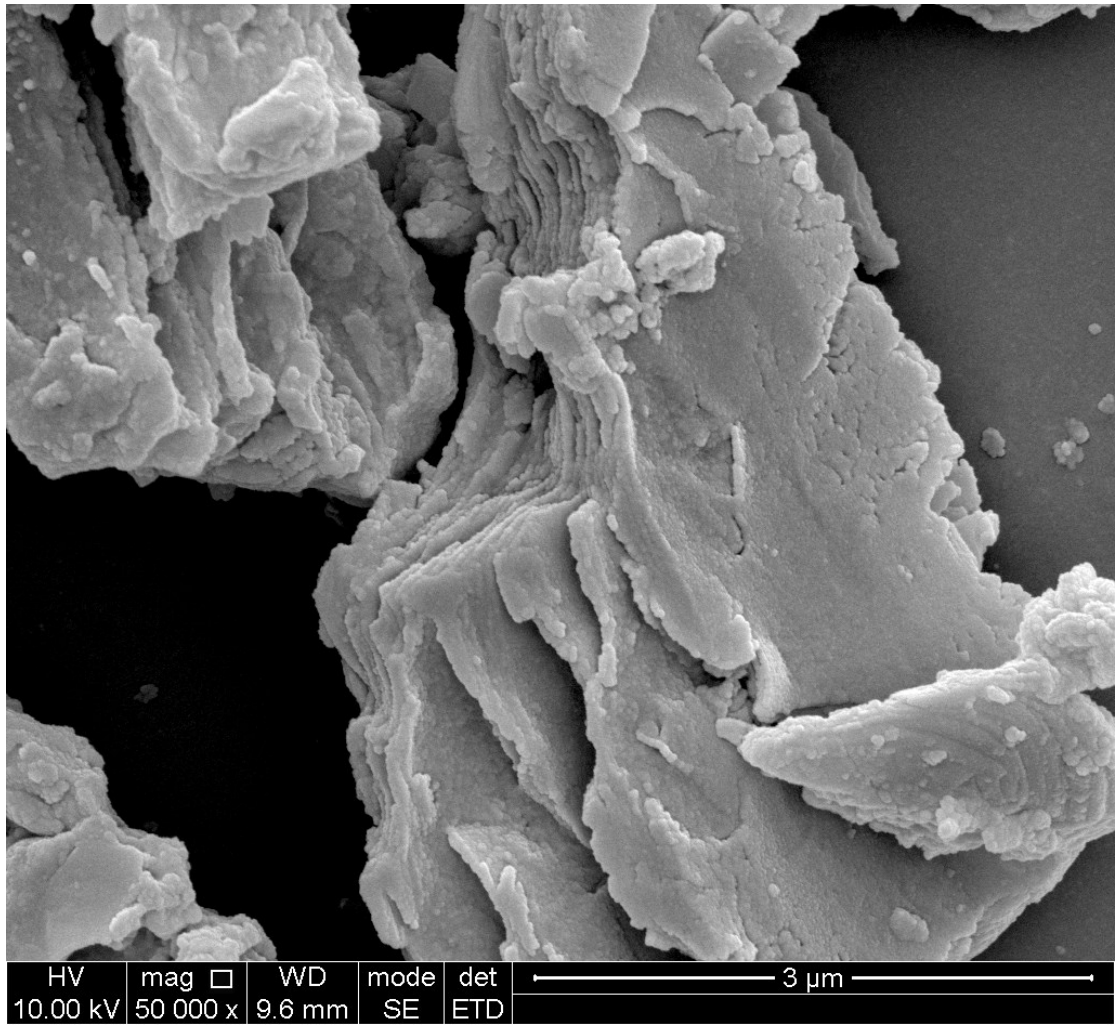

**Figure S3 SEM graph of V<sub>2</sub>C-MXene after hydro-thermal treatment.**

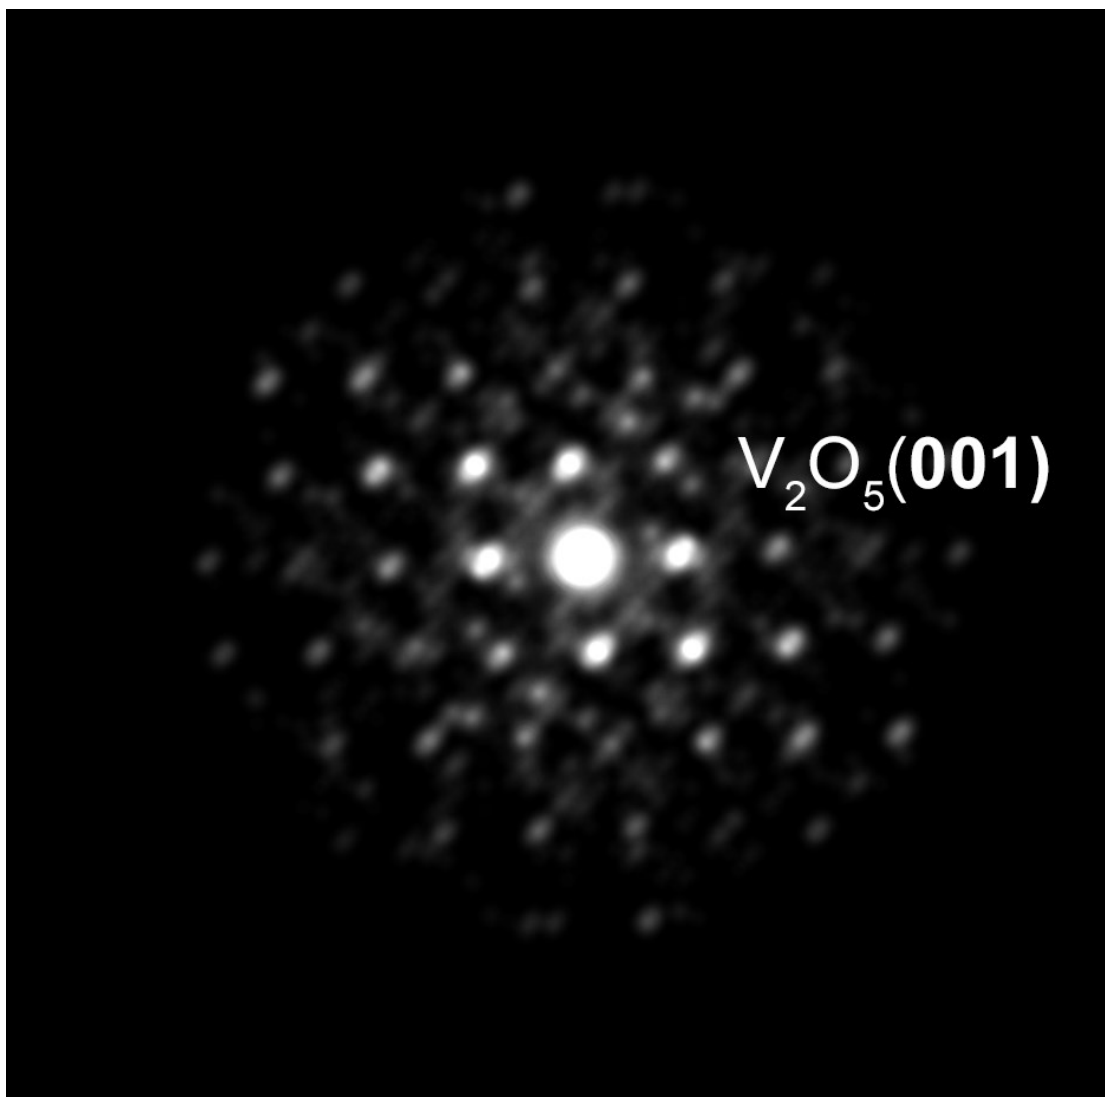

**Figure S4** The selected electron diffraction FFT diagram.

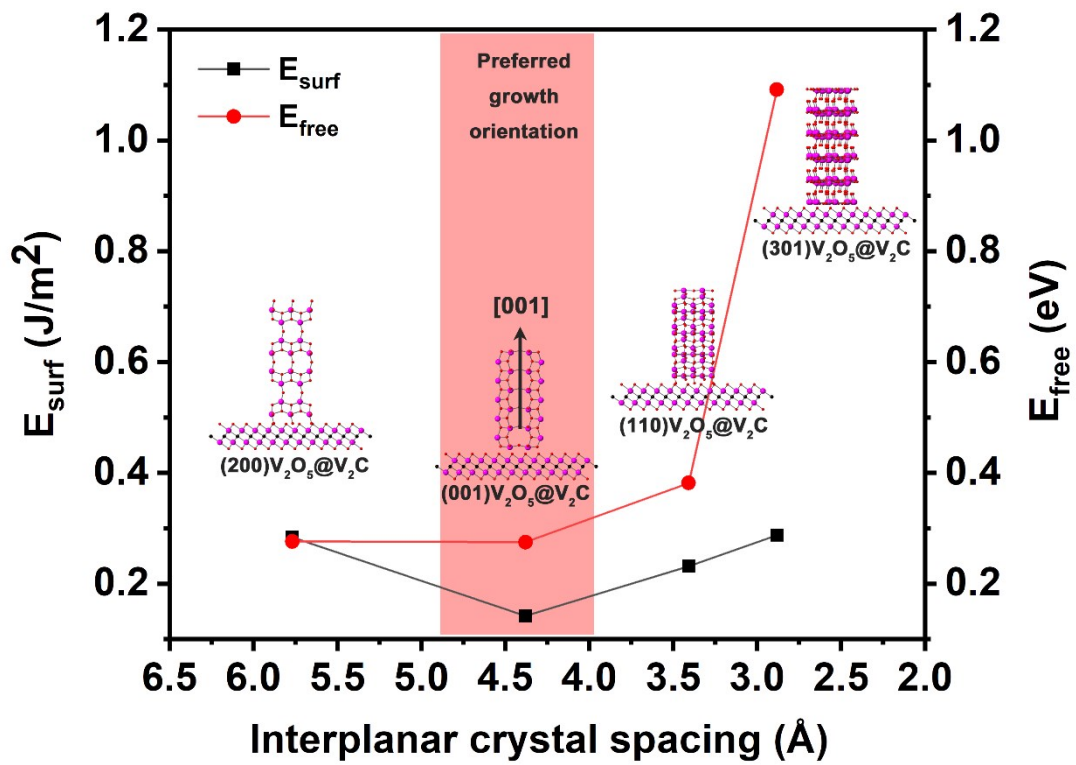

Figure S5 Surface energy and interface free energy calculation for V<sub>2</sub>O<sub>5</sub>@V<sub>2</sub>C.

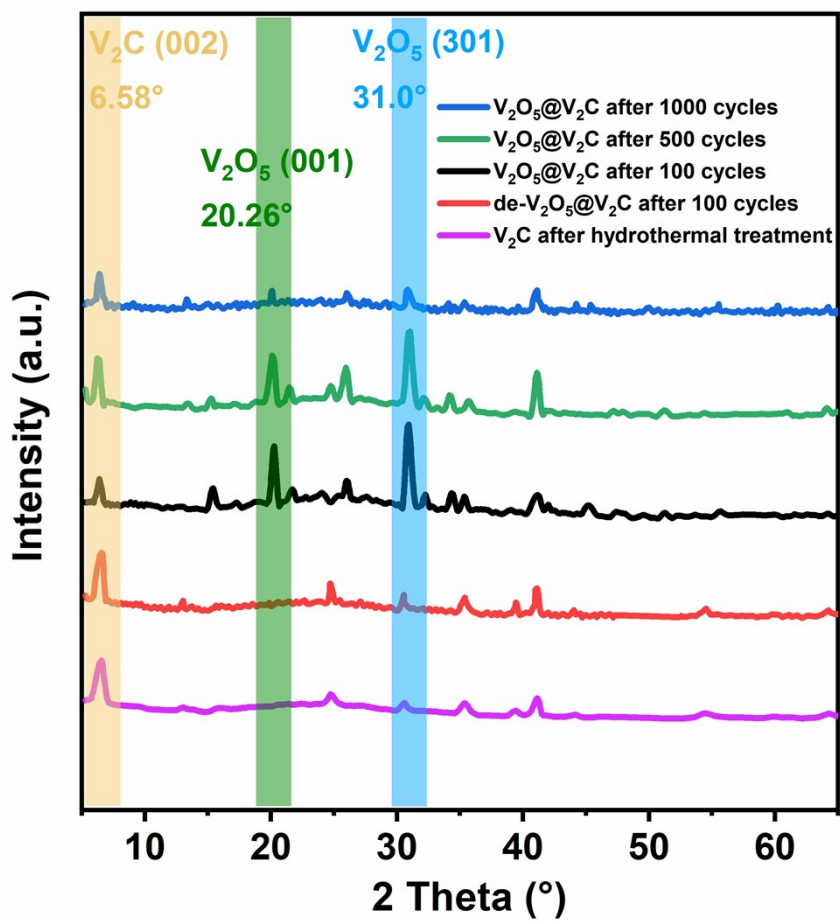

Figure S6 The XRD spectrum of V<sub>2</sub>C, V<sub>2</sub>O<sub>5</sub>@V<sub>2</sub>C after different cycles and de-V<sub>2</sub>O<sub>5</sub>@V<sub>2</sub>C.



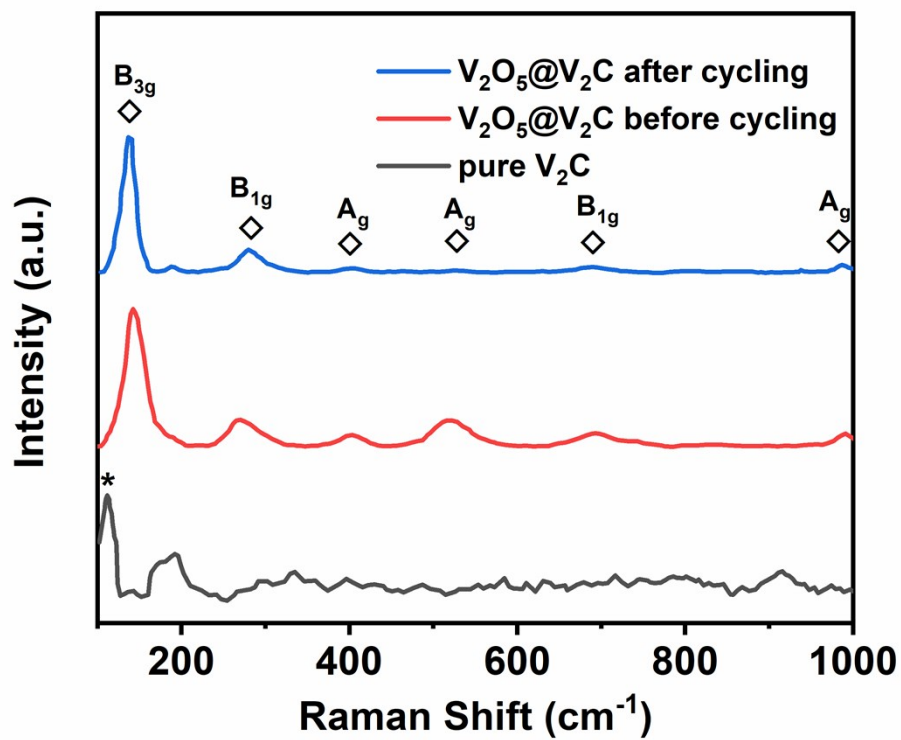

Figure S7 The Raman spectrum of V<sub>2</sub>O<sub>5</sub>@V<sub>2</sub>C after & before cycling and pure V<sub>2</sub>C.



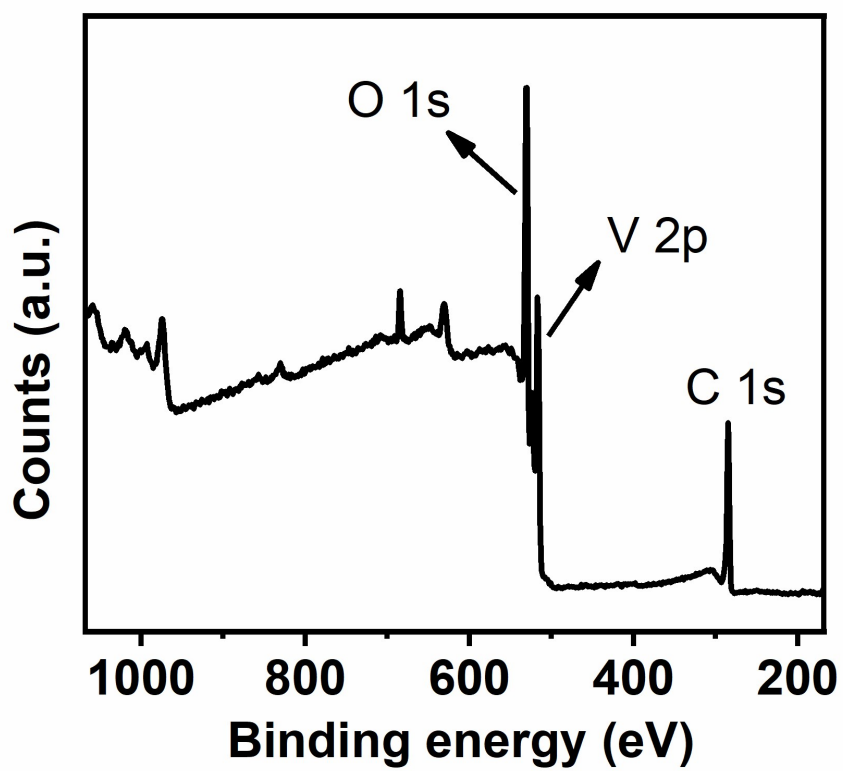

Figure S8 XPS full spectrum of V<sub>2</sub>O<sub>5</sub>@V<sub>2</sub>C.

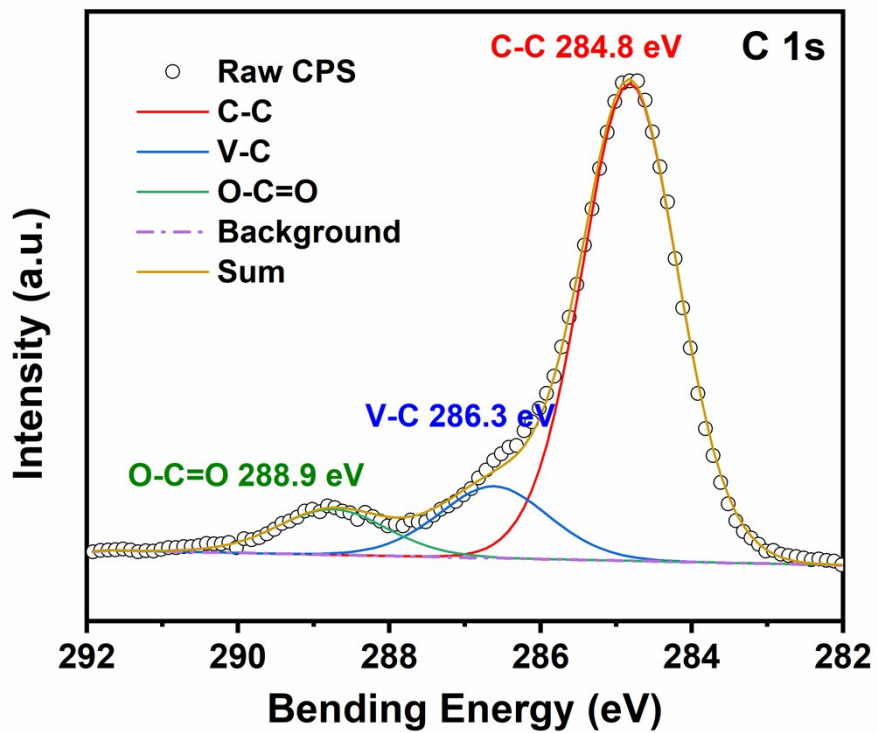

Figure S9 The XPS spectrum of C1s.

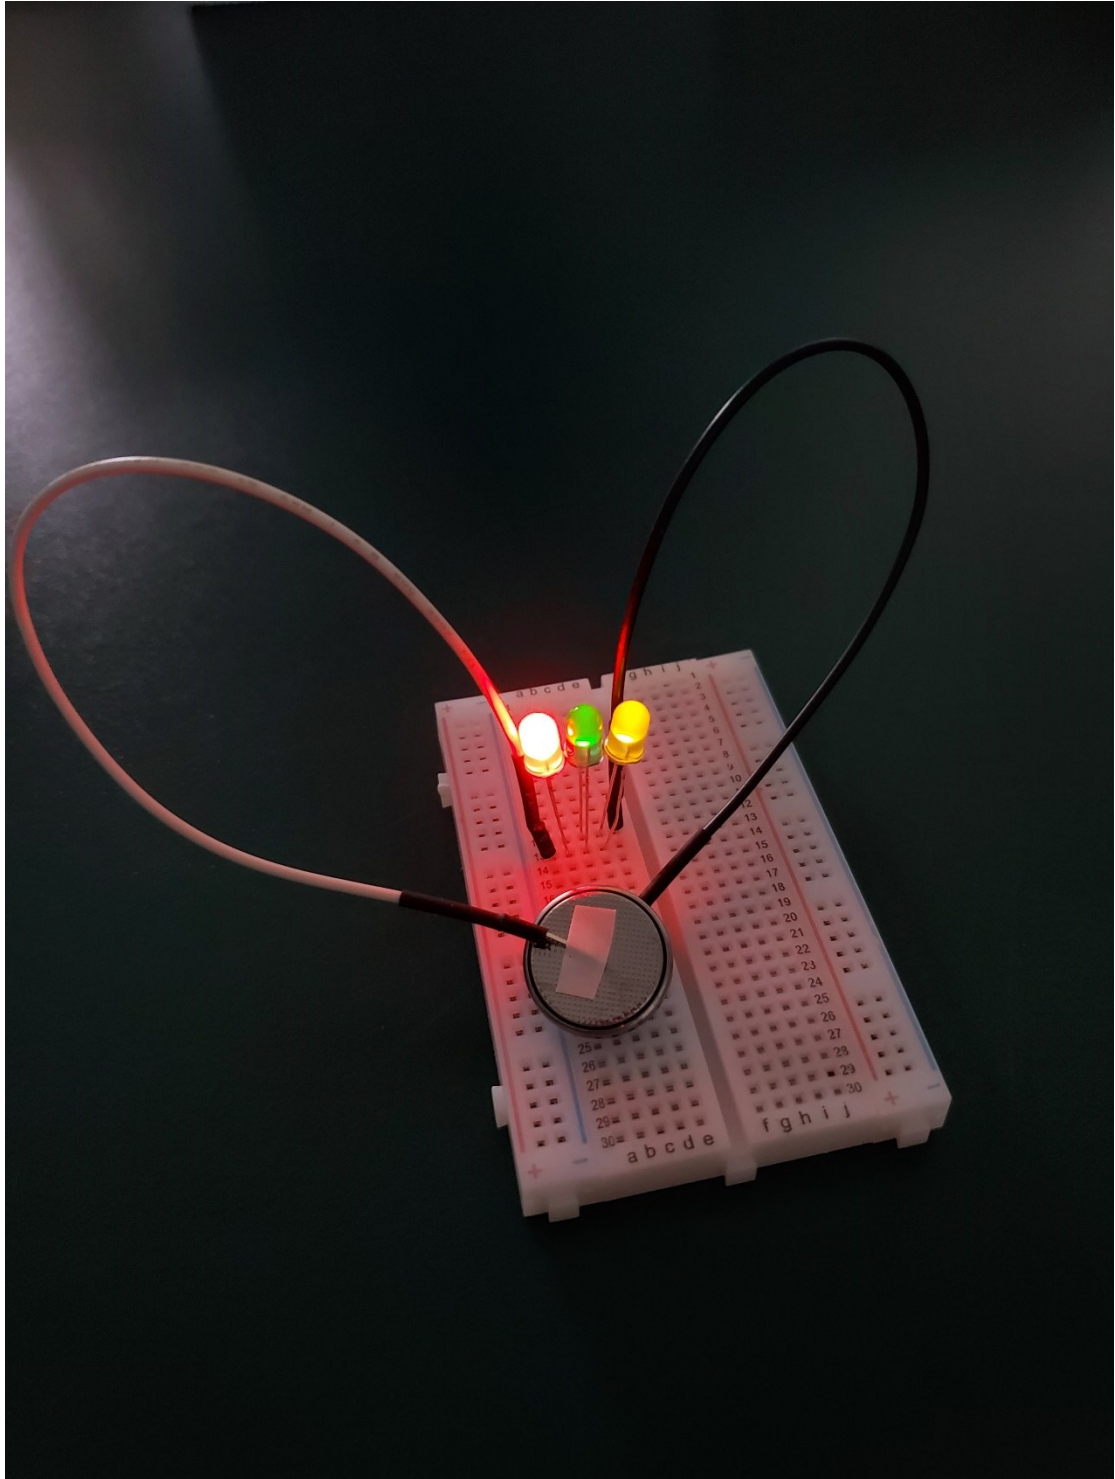

**Figure S10 The actual working diagram of as-assembled lithium sulfur battery.**

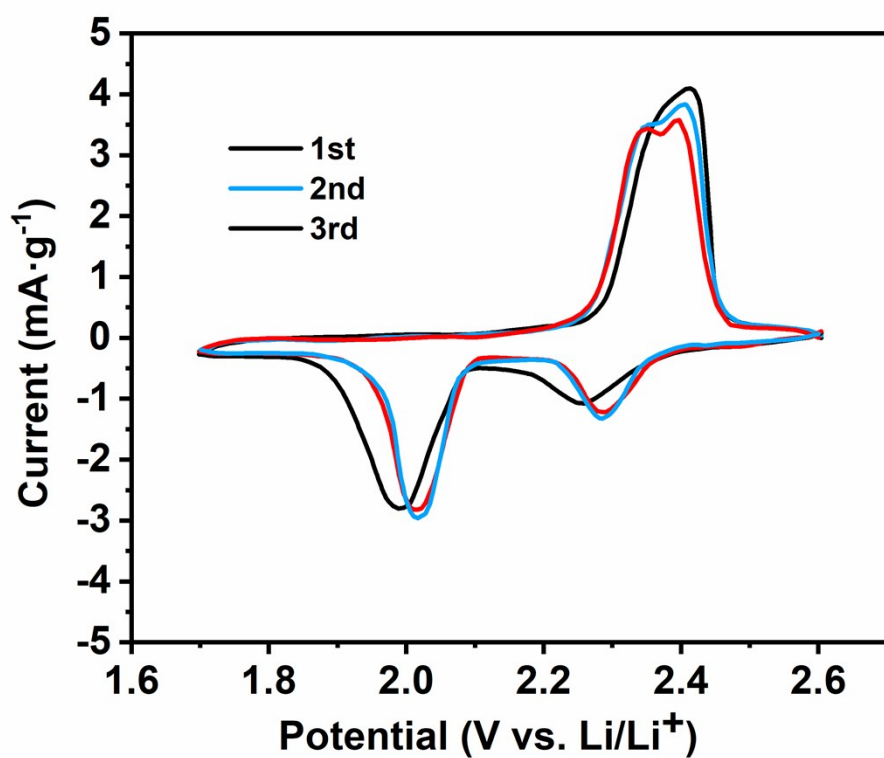

Figure S11 The C-V curve of  $V_2O_5@V_2C$  of the initial 3 cycles.

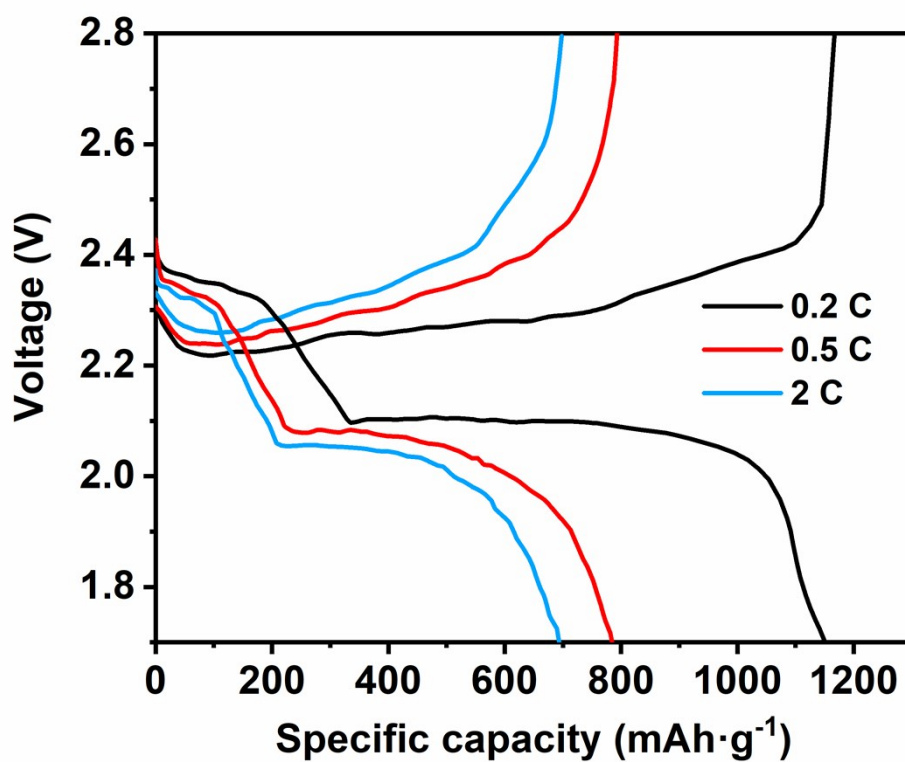

Figure S12 The charge and discharge curve of  $V_2O_5@V_2C$ .

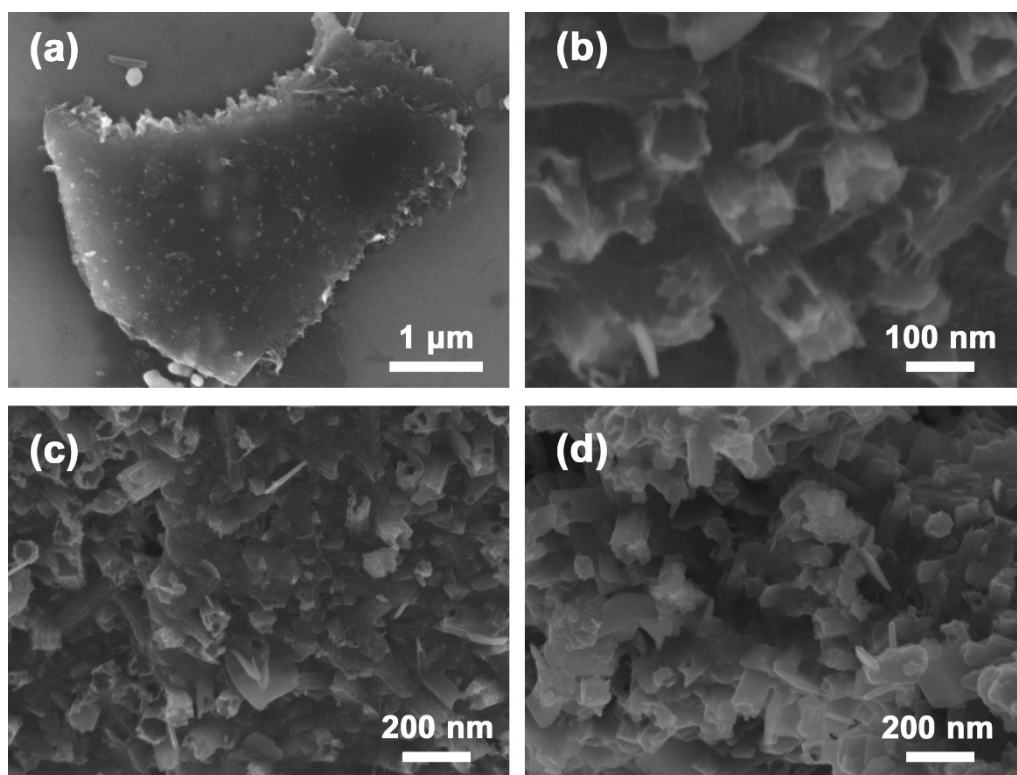

**Figure S13** The SEM graph of (a) de- $\text{V}_2\text{O}_5@\text{V}_2\text{C}$  (b)  $\text{V}_2\text{O}_5@\text{V}_2\text{C}$  after 100 cycles (c)  $\text{V}_2\text{O}_5@\text{V}_2\text{C}$  after 500 cycles (d)  $\text{V}_2\text{O}_5@\text{V}_2\text{C}$  after 1000 cycles.

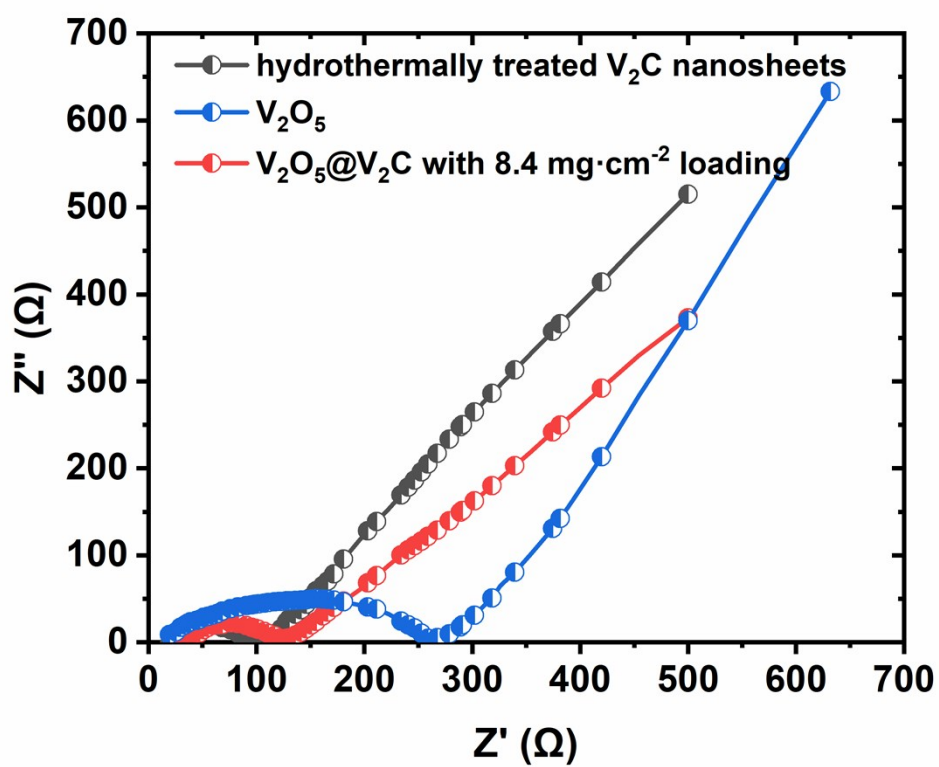

Figure S14 The EIS spectrum of  $V_2C$ ,  $V_2O_5$  and  $V_2O_5@V_2C$  with high S loading.



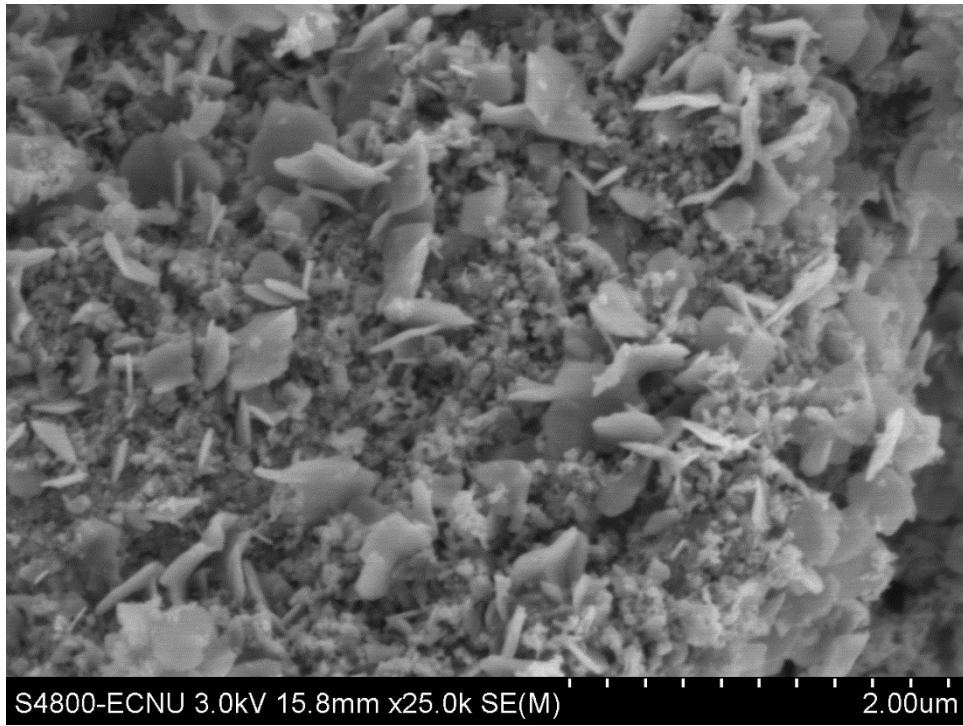

**Figure S15** The V<sub>2</sub>O<sub>5</sub>/S on Al foil.

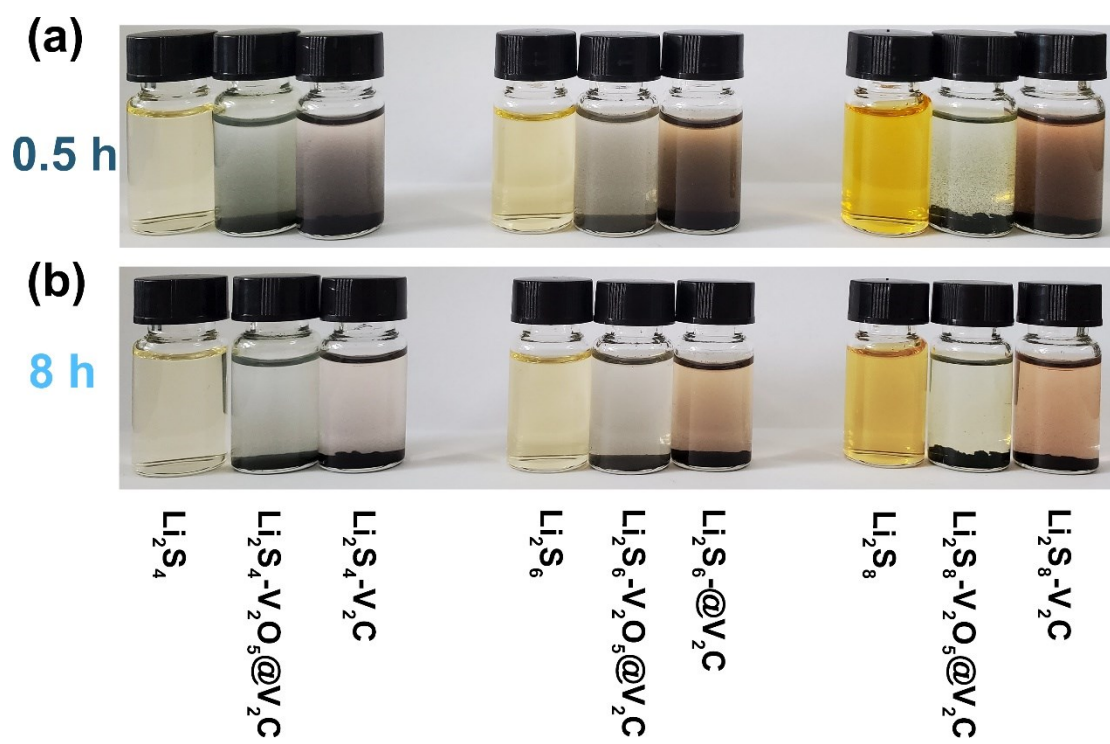

Figure S16 Adsorption performance test diagram of  $\text{V}_2\text{C}$  and  $\text{V}_2\text{O}_5\text{@V}_2\text{C}$ .

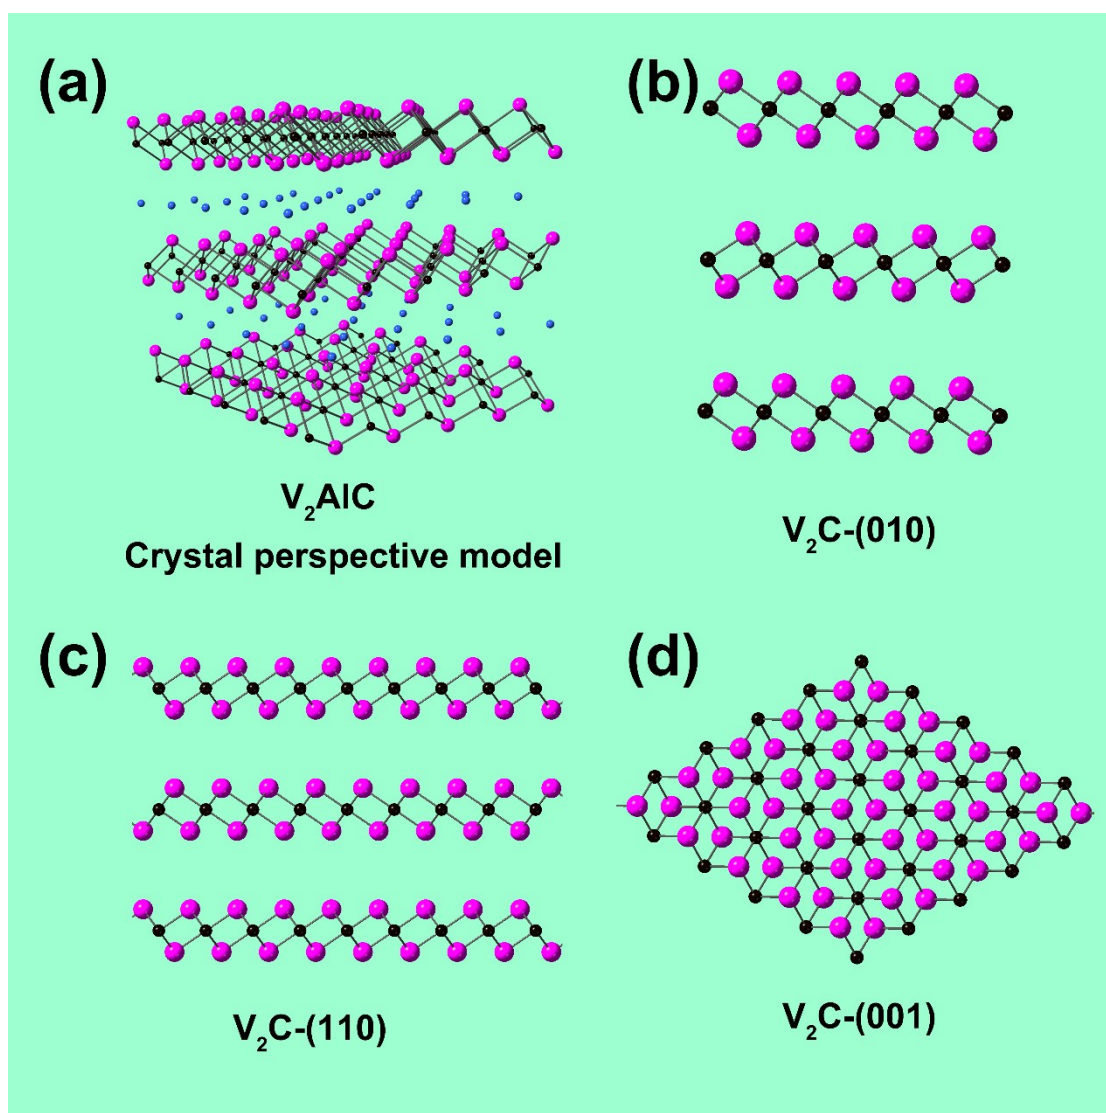

Figure S17 The crystal model of V<sub>2</sub>AlC and V<sub>2</sub>C.

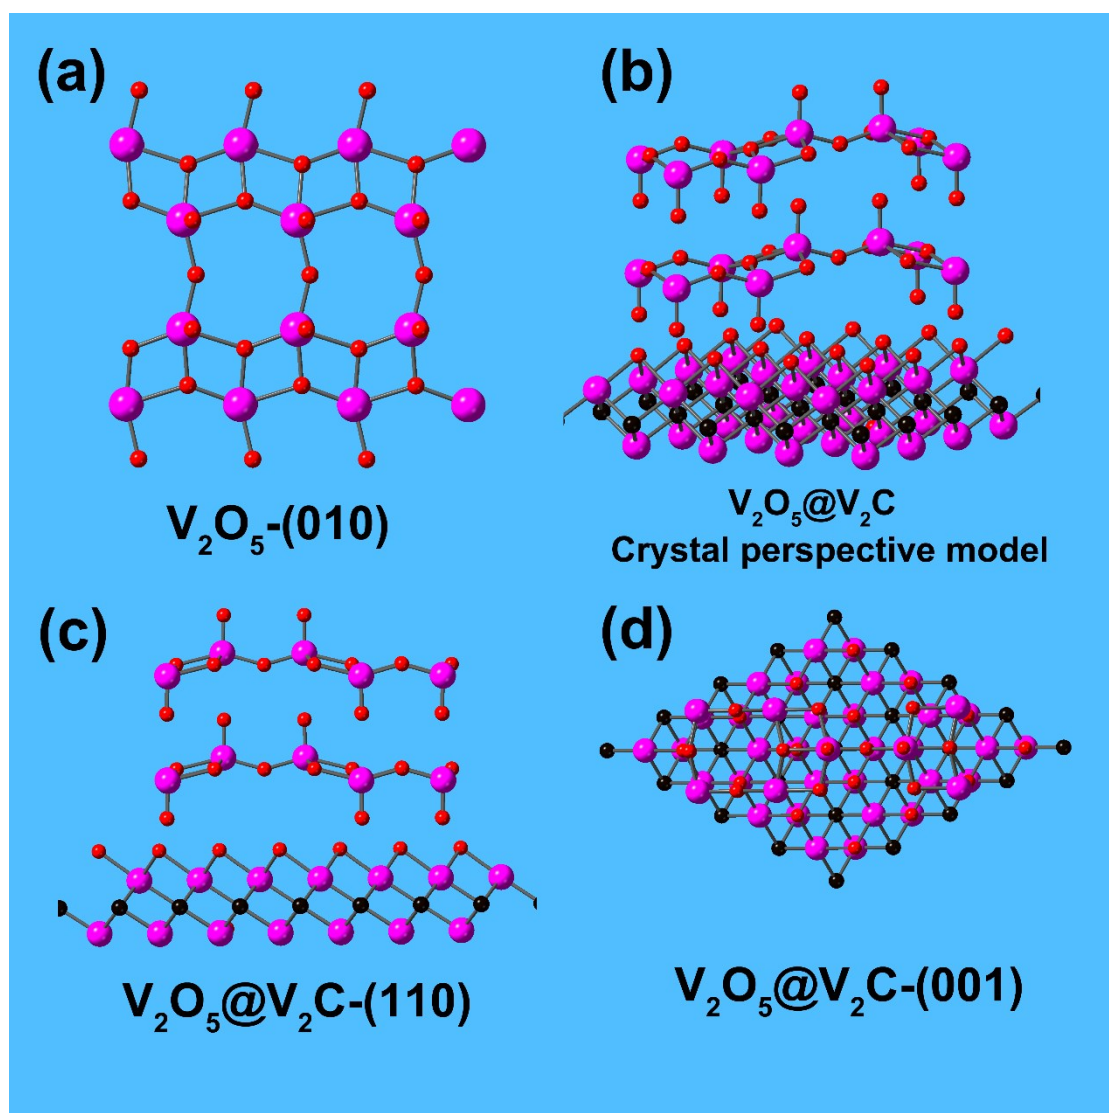

Figure S18 The crystal model of  $V_2O_5$  and  $V_2O_5@V_2C$ .

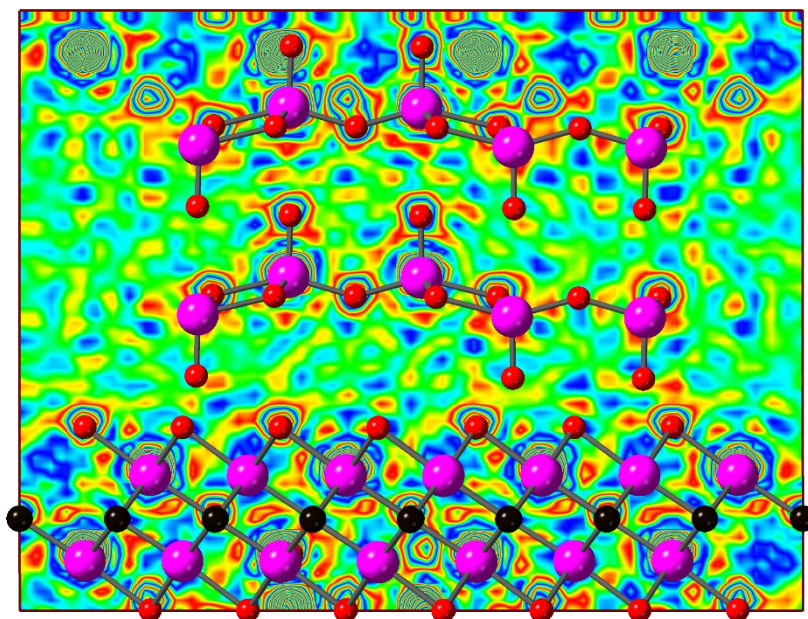

Figure S19 Regional charge density differential diagram of V<sub>2</sub>O<sub>5</sub>@V<sub>2</sub>C.

**Table S1. EDX distribution of V, O and C elements of pure V<sub>2</sub>C, hydrothermally treated V<sub>2</sub>C, V<sub>2</sub>O<sub>5</sub>@V<sub>2</sub>C before and after cycling.**

| <b>Element</b> | <b>Pure V<sub>2</sub>C (at. %)</b> | <b>185°C hydrothermally treated V<sub>2</sub>C (at. %)</b> | <b>de-V<sub>2</sub>O<sub>5</sub>@V<sub>2</sub>C before cycling (at. %)</b> | <b>de-V<sub>2</sub>O<sub>5</sub>@V<sub>2</sub>C after cycling (at. %)</b> |
|----------------|------------------------------------|------------------------------------------------------------|----------------------------------------------------------------------------|---------------------------------------------------------------------------|
| <b>V</b>       | 62.74                              | 53.07                                                      | 57.83                                                                      | 56.42                                                                     |
| <b>C</b>       | 35.11                              | 22.89                                                      | 25.36                                                                      | 25.03                                                                     |
| <b>O</b>       | 2.15                               | 24.04                                                      | 16.81                                                                      | 18.55                                                                     |

**Table S2 The surface energy of V<sub>2</sub>O<sub>5</sub> with different crystal planes and the free**



energy of the interface of  $V_2O_5@V_2C$ .

| Lattice plane   | XRD<br>diffraction<br>peak ( $^\circ$ ) | A ( $\text{\AA}^2$ ) | $E_{\text{slab}}$<br>( $10^4\text{eV}$ ) | $E_{\text{bulk}}$<br>( $10^4\text{eV}$ ) | $E_{\text{surf}}$<br>( $\text{J/m}^2$ ) | $V_2O_5@V_2C$<br>$E_{\text{free}}$ (eV) | Interplanar<br>crystal<br>spacing ( $\text{\AA}$ ) |
|-----------------|-----------------------------------------|----------------------|------------------------------------------|------------------------------------------|-----------------------------------------|-----------------------------------------|----------------------------------------------------|
| $V_2O_5$ -(200) | 15.35                                   | 15.54                | -2.45674                                 |                                          | 0.2835                                  | 0.2761                                  | 5.768                                              |
| $V_2O_5$ -(001) | 20.26                                   | 31.66                | -2.45675                                 | -1.22840                                 | 0.1419                                  | 0.2750                                  | 4.379                                              |
| $V_2O_5$ -(110) | 26.13                                   | 26.30                | -2.45528                                 |                                          | 0.2315                                  | 0.3816                                  | 3.408                                              |
| $V_2O_5$ -(301) | 31.0                                    | 60.79                | -2.45462                                 |                                          | 0.2876                                  | 1.0913                                  | 2.882                                              |
| $V_2C$ -(002)   | 8.50                                    | 68.20                | -0.83330                                 | -0.42217                                 | 1.2960                                  | -                                       | -                                                  |



Table S3 Performance comparison table of vanadium base positive electrode matrix materials in recent years.

| Host                                            | S loading (mg cm <sup>-2</sup> ) | Current density (C) | Cycles | Initial capacity (mAh g <sup>-1</sup> ) | Areal capacity (mAh cm <sup>-2</sup> ) | Capacity decay (% per cycle) | Year | Ref       |
|-------------------------------------------------|----------------------------------|---------------------|--------|-----------------------------------------|----------------------------------------|------------------------------|------|-----------|
| V <sub>2</sub> O <sub>5</sub> @V <sub>2</sub> C | 2.0                              | 0.2                 | 100    | 1173                                    | 2.35                                   | 0.043                        | -    | This work |
|                                                 |                                  | 0.5                 | 1000   | 1138                                    | 2.28                                   | 0.047                        |      |           |
|                                                 |                                  | 2                   | 500    | 1106                                    | 2.21                                   | 0.053                        |      |           |
|                                                 | 4.2                              | 0.2                 | 200    | 1093                                    | 4.50                                   | 0.078                        |      |           |
|                                                 | 8.4                              | 0.2                 | 200    | 1058                                    | 8.59                                   | 0.11                         |      |           |
| VO <sub>2</sub> (p)@V <sub>2</sub> C            | 2.0                              | 2                   | 500    | 1210                                    | 2.42                                   | 0.062                        | 2019 | 1         |
| V <sub>2</sub> O <sub>5</sub> -rGO              | 1.2-1.5                          | 0.2                 | 300    | ~1000                                   | 1.2-1.5                                | 0.048                        | 2018 | 2         |
| rGO-VS <sub>2</sub>                             | 2.6                              | 0.1                 | 100    | 721                                     | 1.87                                   | 0.094                        | 2018 | 3         |
| VS <sub>2</sub> -C                              | 1-2                              | 2                   | 100    | 1185                                    | 1.18-2.37                              | 0.16                         | 2018 | 4         |
| V <sub>2</sub> O <sub>5</sub> -C                | 5.5                              | 2                   | 500    | 790                                     | 1.6                                    | 0.041                        | 2017 | 5         |
| VO <sub>x</sub> -SWCNT                          | 1.0                              | 1                   | 300    | 1069                                    | 1.7                                    | 0.095                        | 2018 | 6         |
| VN-C                                            | 2.8                              | 1                   | 200    | 1200                                    | 2.8                                    | 0.24                         | 2017 | 7         |
| VN nanobubbles                                  | 6.8                              | 0.5                 | 200    | 800                                     | 5.4                                    | 0.15                         | 2016 | 8         |
| VO <sub>2</sub> -VN                             | 4.2                              | 2                   | 800    | 1105                                    | 2.21                                   | 0.06                         | 2018 | 9         |

**Table S4 Equivalent circuit fitting parameter result table.**

| <b>Equivalent<br/>parameter</b> | <b>Initial</b>                                   |                       | <b>after cycling</b>                             |                       |
|---------------------------------|--------------------------------------------------|-----------------------|--------------------------------------------------|-----------------------|
|                                 | <b>V<sub>2</sub>O<sub>5</sub>@V<sub>2</sub>C</b> | <b>V<sub>2</sub>C</b> | <b>V<sub>2</sub>O<sub>5</sub>@V<sub>2</sub>C</b> | <b>V<sub>2</sub>C</b> |
| R <sub>s</sub> / Ohm            | 3.12                                             | 5.01                  | 3.93                                             | 8.22                  |
| R <sub>surf</sub> / Ohm         | 11.67                                            | 17.10                 | 33.71                                            | 61.32                 |
| R <sub>ct</sub> / Ohm           | 51.23                                            | 82.63                 | 88.27                                            | 184.6                 |

**Table S5 Equivalent circuit fitting parameter result table.**

| <b>Equivalent parameter</b> | <b>Hydrothermally treated V<sub>2</sub>C</b> | <b>Pure V<sub>2</sub>O<sub>5</sub></b> | <b>V<sub>2</sub>O<sub>5</sub>@V<sub>2</sub>C with 8.4 mg·cm<sup>-2</sup> loading</b> |
|-----------------------------|----------------------------------------------|----------------------------------------|--------------------------------------------------------------------------------------|
| R <sub>s</sub> / Ohm        | 9.73                                         | 8.72                                   | 7.38                                                                                 |
| R <sub>surf</sub> / Ohm     | 19.84                                        | 22.14                                  | 14.51                                                                                |
| R <sub>ct</sub> / Ohm       | 45.31                                        | 128.37                                 | 63.03                                                                                |

## Reference

1. Z. Wang, K. Yu, Y. Feng, R. Qi, J. Ren and Z. Zhu, *ACS Appl. Mat. Interfaces*, 2019, **11**, 44282-44292.
2. Y. Guo, Y. Zhang, Y. Zhang, M. Xiang, H. Wu, H. Liu and S. Dou, *J. Mater. Chem. A*, 2018, **6**, 19358-19370.
3. Z. Cheng, Z. Xiao, H. Pan, S. Wang and R. Wang, *Adv. Energy Mater.*, 2018, **8**, 1702337
4. X. Zhu, W. Zhao, Y. Song, Q. Li, F. Ding, J. Sun, L. Zhang and Z. Liu, *Adv. Energy Mater.*, 2018, **8**, 1800201.
5. L. Ma, H. Yuan, W. Zhang, G. Zhu, Y. Wang, Y. Hu, P. Zhao, R. Chen, T. Chen, J. Liu, Z. Hu and Z. Jin, *Nano Lett.*, 2017, **17**, 7839-7846.
6. M. Zhang, Y. Yang, X. Zhang, M. Cheng, H. Yuan, K. Amin, A. Ahmad, L. Mao, W. Yan and Z. Wei, *Adv. Mater. Interfaces*, 2018, **5**, 1800766
7. X. Li, K. Ding, B. Gao, Q. Li, Y. Li, J. Fu, X. Zhang, P. K. Chu and K. Huo, *Nano Energy*, 2017, **40**, 655-662.
8. X. Liang, C. Y. Kwok, F. Lodi-Marzano, Q. Pang, M. Cuisinier, H. Huang, C. J. Hart, D. Houtarde, K. Kaup, H. Sommer, T. Brezesinski, J. Janek and L. F. Nazar, *Adv. Energy Mater.*, 2016, **6**, 1501636
9. Y. Song, W. Zhao, L. Kong, L. Zhang, X. Zhu, Y. Shao, F. Ding, Q. Zhang, J. Sun and Z. Liu, *Energy Environ. Sci.*, 2018, **11**, 2620-2630.
